# Supplementary material for: Stealth Liposomes (PEGylated) Containing an Anticancer Drug Camptothecin: In Vitro Characterization and In Vivo Pharmacokinetic and Tissue Distribution Study
Source: MDPI journal article supplement (doi:10.3390/molecules27031086), 2022-02-06
Supplement: s1 [file s1]

## SUPPLEMENTARY MATERIAL – ZETA SIZER REPORT

|                                              |                                                      |              |                 |
|----------------------------------------------|------------------------------------------------------|--------------|-----------------|
| <b>Sample Details</b>                        |                                                      |              |                 |
| Sample Name: Lipo F2 1                       |                                                      |              |                 |
| SOP Name: nano size.sop                      |                                                      |              |                 |
| General Notes:                               |                                                      |              |                 |
| File Name: Intak.ots                         | Dispersant Name: Water                               |              |                 |
| Record Number: 519                           | Dispersant RI: 1.330                                 |              |                 |
| Material RI: 1.00                            | Viscosity (cP): 0.6872                               |              |                 |
| Material Absorption: 0.500                   | Measurement Date and Time: Sunday, February 02, 2020 |              |                 |
| <hr/>                                        |                                                      |              |                 |
| <b>System</b>                                |                                                      |              |                 |
| Temperature (°C): 25.0                       | Duration Used (s): 60                                |              |                 |
| Count Rate (kcps): 277.4                     | Measurement Position (mm): 5.50                      |              |                 |
| Cell Description: Clear disposable zeta cell | Attenuator: 5                                        |              |                 |
| <hr/>                                        |                                                      |              |                 |
| <b>Results</b>                               |                                                      |              |                 |
|                                              | Size (d.nm):                                         | % Intensity: | St Dev (d.n...) |
| Z-Average (d.nm): 103.4                      | Peak 1: 168.1                                        | 97.3         | 135.2           |
| Pdl: 0.391                                   | Peak 2: 4542                                         | 2.7          | 859.6           |
| Intercept: 0.925                             | Peak 3: 0.000                                        | 0.0          | 0.000           |
| Result quality: Good                         |                                                      |              |                 |
| <hr/>                                        |                                                      |              |                 |
| Size Distribution by Intensity               |                                                      |              |                 |

(A)

|                                              |                                                           |              |                |
|----------------------------------------------|-----------------------------------------------------------|--------------|----------------|
| <b>Sample Details</b>                        |                                                           |              |                |
| Sample Name: Lipo F7 1                       |                                                           |              |                |
| SOP Name: nano size.sop                      |                                                           |              |                |
| General Notes:                               |                                                           |              |                |
| File Name: Intak.ots                         | Dispersant Name: Water                                    |              |                |
| Record Number: 524                           | Dispersant RI: 1.330                                      |              |                |
| Material RI: 1.00                            | Viscosity (cP): 0.6872                                    |              |                |
| Material Absorbion: 0.500                    | Measurement Date and Time: Sunday, February 02, 2020 1... |              |                |
| <hr/>                                        |                                                           |              |                |
| <b>System</b>                                |                                                           |              |                |
| Temperature (°C): 25.0                       | Duration Used (s): 60                                     |              |                |
| Count Rate (kcps): 293.3                     | Measurement Position (mm): 5.50                           |              |                |
| Cell Description: Clear disposable zeta cell | Attenuator: 6                                             |              |                |
| <hr/>                                        |                                                           |              |                |
| <b>Results</b>                               |                                                           |              |                |
| Z-Average (d.nm): 160.3                      | Size (d.nm):                                              | % Intensity: | St Dev (d.nm): |
| Pdl: 0.453                                   | Peak 1: 234.5                                             | 96.5         | 169.7          |
| Intercept: 0.917                             | Peak 2: 4697                                              | 3.5          | 789.3          |
| Result quality: Good                         | Peak 3: 0.000                                             | 0.0          | 0.000          |
| <hr/>                                        |                                                           |              |                |
| Size Distribution by Number                  |                                                           |              |                |

(B)

Zeta sizer report of stealth liposomes containing CPT.

(A), (B) represents the stealth liposomal formulations F8 and F12 respectively.
